# Supplementary material for: Liquid Hybridization and Solid Phase Detection: A Highly Sensitive and Accurate Strategy for MicroRNA Detection in Plants and Animals
Source: PubMed Central journal article supplement (PMC5037736; doi:10.3390/ijms17091457), 2016-09-01
Supplement: ijms-17-01457-s001.pdf [file ijms-17-01457-s001.pdf]

# Supplementary Materials: Liquid Hybridization and Solid Phase Detection: A Highly Sensitive and Accurate Strategy for MicroRNA Detection in Plants and Animals

Fosheng Li, Lanju Mei, Cheng Zhan, Qiang Mao, Min Yao, Shenghua Wang, Lin Tang and Fang Chen

**Table S1.** Difference in detections between digoxigenin DIG/Biotin/fluorescein isothiocyanate (FITC) systems.

|                                           | DIG                   | Biotin               | FITC [31]              |
|-------------------------------------------|-----------------------|----------------------|------------------------|
| Detection buffer (pH 9.5)                 | Yes (3–5 min)         | No                   | No                     |
| Substrate for detection                   | CDP Star <sup>a</sup> | CDP Star             | Luminol <sup>b</sup>   |
| Enzyme used for crosslinking              | Alkaline phosphatase  | Alkaline phosphatase | Horseradish peroxidase |
| Incubation time for detection             | 5 min                 | 5 min                | 5 min                  |
| Exposure time                             | 5–20 min              | 5–20 min             | 5–20 min               |
| Duration of luminescence                  | 24–48h                | 24–48 h              | 6 h                    |
| Supporting multiple exposure              | Yes                   | Yes                  | Yes                    |
| Identification of single-base differences | Yes                   | Yes                  | Yes                    |
| Sensitivity                               | Dot blot              | 0.01 fmol            | 0.005 fmol             |
|                                           | Band blot             | 0.25 fmol            | 0.1 fmol               |
|                                           |                       | 0.05 fmol            | 0.05 fmol              |
|                                           |                       | 0.1 fmol             | 0.5 fmol               |
|                                           |                       |                      | 0.01 pmol              |
|                                           |                       |                      | 0.1 pmol               |

<sup>a</sup> CDP Star: disodium 3-[4-methoxy Spiro{1,2-dioxetane-3,2'-[5'-chloro]tricyclo[3.3.1.1.3,7]decan}-4-yl] phenyl phosphate; <sup>b</sup> Luminol: 5-amino-2,3-dihydro-1,4-phthalazinedione.

**Table S2.** MicroRNA (miRNA) detection from different organisms by liquid hybridization and solid phase detection (LSHPD) strategy.

| miRNAs            | Species (tissues)                   | Sequences (5'→3')               | Results |
|-------------------|-------------------------------------|---------------------------------|---------|
| <i>Osa-miR156</i> | <i>Oryza sativa</i> -stem           | UGA CAG AAG AGA GUG AGC AC      |         |
|                   |                                     |                                 |         |
|                   |                                     |                                 |         |
| <i>Osa-miR156</i> | <i>Oryza sativa</i> -roots          | UGA CAG AAG AGA GUG AGC AC      |         |
|                   |                                     |                                 |         |
|                   |                                     |                                 |         |
| <i>Osa-miR156</i> | <i>Oryza sativa</i> -leaves         | UGA CAG AAG AGA GUG AGC AC      |         |
|                   |                                     |                                 |         |
|                   |                                     |                                 |         |
| <i>miR263</i>     | <i>Oryza sativa</i> -leaves         | GUG GGU CUA AGG ACU AUA UUA ACC |         |
| <i>miR557</i>     | <i>Oryza sativa</i> -leaves         | AUU UGU UGU AUU AGG GAA UGU CUC |         |
| <i>miR1188</i>    | <i>Oryza sativa</i> -leaves         | UGG AUG UGA CAU ACU CUA GUA     |         |
| <i>miR156</i>     | <i>Jatropha curcas</i> -leaves      | UGA CAG AAG AGA GUG AGC AC      |         |
| <i>miR156</i>     | <i>Arabidopsis thaliana</i> -leaves | UGA CAG AAG AGA GUG AGC AC      |         |
| <i>let-7a</i>     | <i>Homo sapiens</i> -blood          | UGA GGU AGU AGG UUG UAU AGU U   |         |
| <i>let-7a</i>     | <i>Mus musculus</i> -muscle         | UGA GGU AGU AGG UUG UAU AGU U   |         |
| <i>let-7a</i>     | <i>Gallus domesticus</i> -blood     | UGA GGU AGU AGG UUG UAU AGU U   |         |

*miR263* and *miR557* are low-abundance intronic miRNAs and *miR1188* is an abundant intronic miRNA in *Oryza sativa* [32].

**Table S3.** Some properties of FITC, biotin and digoxigenin.

| Name                              | Molecular Formula     | Molecular Weight | Chemical Structure                                                                  |
|-----------------------------------|-----------------------|------------------|-------------------------------------------------------------------------------------|
| Biotin                            | $C_{10}H_{16}N_2O_3S$ | 244.31           | 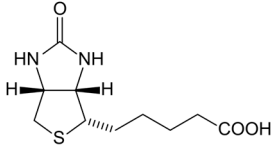 |
| Digoxigenin (DIG)                 | $C_{23}H_{34}O_5$     | 390.51           |  |
| Fluorescein isothiocyanate (FITC) | $C_{21}H_{11}NO_5S$   | 389.382          |  |
